# Supplementary material for: Pathological Correlation of a Cardiac Mass with Multimodality Imaging
Source: Case Rep Med. 2023 Apr 18;2023:7352934. doi: 10.1155/2023/7352934 (PMC10129422; doi:10.1155/2023/7352934)
Supplement: Supplementary Materials — SF1: Cine images showing the mass in the RV traversing the pulmonic valve into the main pulmonary artery on computed tomographic image of the chest. SF2: Cine images of magnetic resonance imaging showing the RV mass traversing the pulmonic valve. [file 7352934.f1.zip]

Archive with 2 entries (2 files):
- supplementary video/Supplementary video 1.avi
- supplementary video/Supplementary video 2.avi
